# Supplementary material for: Highly flexible and stable aptamer-caged nanoparticles for control of thrombin activity
Source: Royal Society of Chemistry journal article supplement (doi:10.1039/c1ra00344e), 2011-12-23
Supplement: c1ra00344e.pdf [file c1ra00344e.pdf]

## Supplementary Information

### Highly Flexible and Stable Aptamer-Caged Nanoparticles for Control of Thrombin Activity

Chia-Lun Hsu,<sup>a</sup> Shih-Chun Wei,<sup>a</sup> Jyun-Wei Jian,<sup>a</sup> Huan-Tsung Chang,<sup>b</sup> Wei-Hsi Chen,<sup>c</sup> and Chih-Ching Huang\*<sup>a</sup>

<sup>a</sup> *Institute of Bioscience and Biotechnology and Center of Excellence for Marine Bioenvironment and Biotechnology (CMBB), National Taiwan Ocean University, 2, Pei-Ning Road, Keelung, 20224, Taiwan. E-mail: huanging@ntou.edu.tw; Fax: +011-886-2-24622034; Tel: +011-886-2-24622192#5517*

<sup>b</sup> *Department of Chemistry, National Taiwan University, Taipei, Taiwan*

<sup>c</sup> *Chemical Analysis Division, Institute of Nuclear Energy Research, Taoyuan, Taiwan*

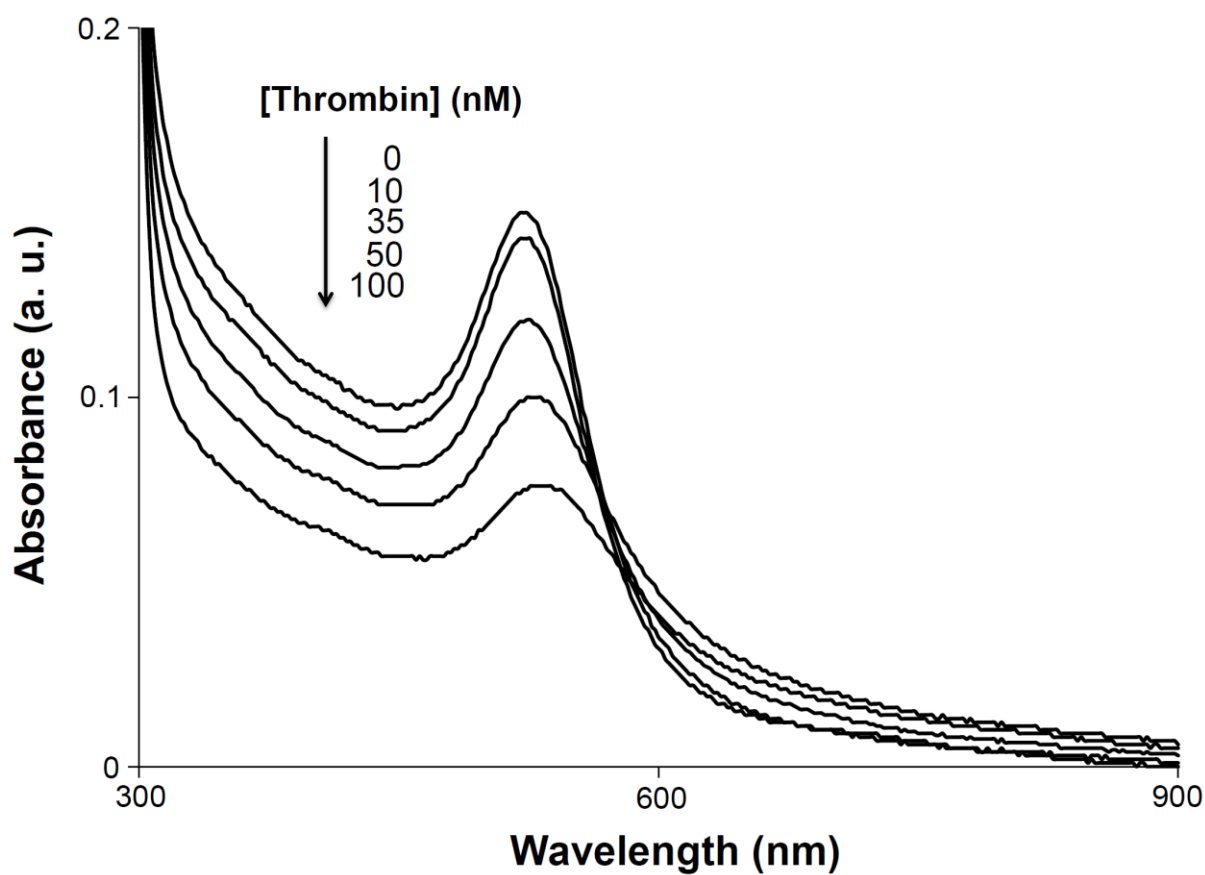

**Fig. S1** The UV-Vis absorption spectrum of TBA<sub>15</sub>/TBA<sub>29</sub>-P<sub>8</sub>T<sub>15</sub>-Au NPs (1.0 nM) in the presence of thrombin (0–100 nM) with the physiological buffer containing 100 μM BSA. Other conditions were the same as those described in Figure 1.

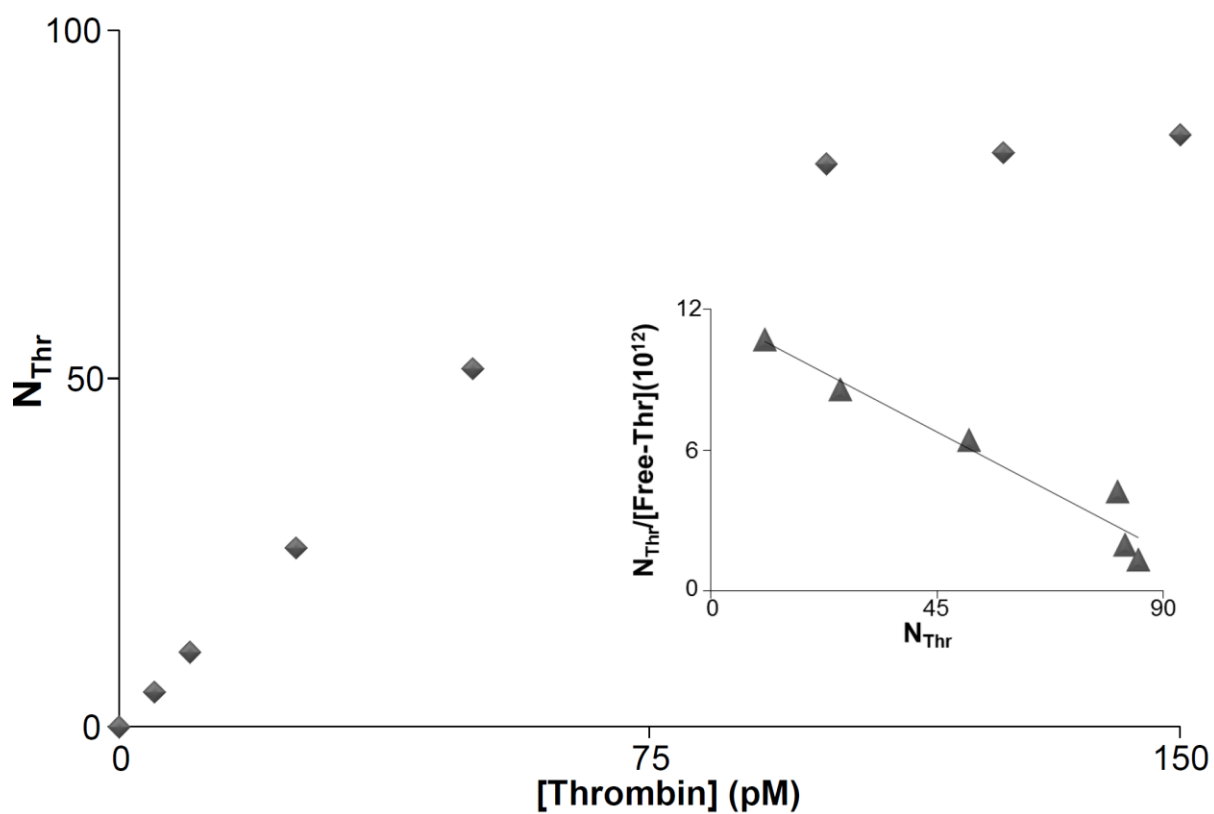

**Fig. S2** Dissociation constant  $K_d$  for thrombin–TBA<sub>15</sub>/TBA<sub>29</sub>-P<sub>8</sub>T<sub>15</sub>-Au NPs complexes, determined from a plot of  $N_{Thr}/[Free-Thr]$  versus  $N_{Thr}$ .

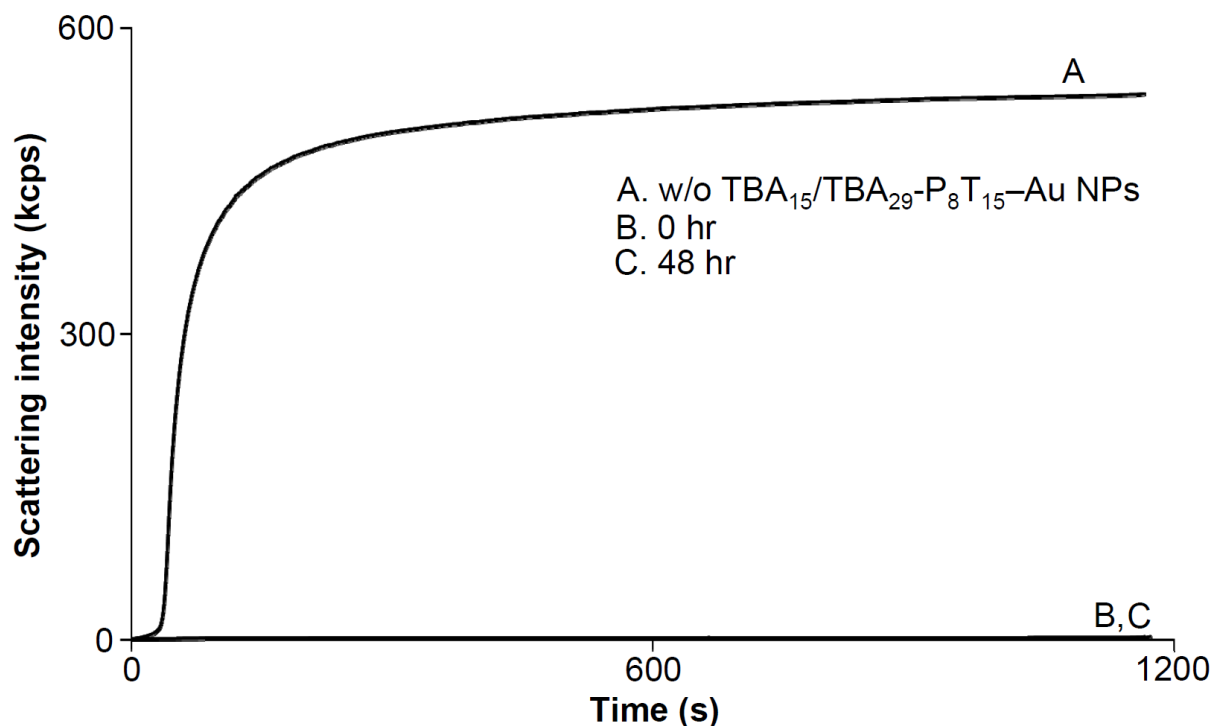

**Fig. S3** Scattering intensity as a function of time, validating the use of  $\text{TBA}_{15}/\text{TBA}_{29}\text{-P}_8\text{T}_{15}\text{-Au}$  NPs as a stable anticoagulant agent in a representative human-plasma sample.  $\text{TBA}_{15}/\text{TBA}_{29}\text{-h}_8\text{T}_{15}\text{-Au}$  NPs (1 nM, 990  $\mu\text{L}$ ) were incubated in two-fold-diluted human-plasma samples for 0 and 48 h, followed by the addition of thrombin (500 nM, 10  $\mu\text{L}$ ). Other conditions were the same as those described in Figure 1.
